# Supplementary material for: Capacitive behavior of activated carbons obtained from coffee husk
Source: Royal Society of Chemistry journal article supplement (doi:10.1039/d0ra06206e), 2020-01-01
Supplement: d0ra06206e1.pdf [file d0ra06206e1.pdf]

## Supplementary Information

### Capacitive behavior of activated carbons obtained from coffee husk

Nathalia Ramirez,<sup>a,b</sup> Fabiana Sardella,<sup>b</sup> Cristina Deiana,<sup>b</sup> Anja Schlosser,<sup>a</sup> Dennis Müller,<sup>a</sup> Patrick A. Kissling,<sup>a</sup> Lars F. Klepzig,<sup>a,c</sup> and Nadja C. Bigall,<sup>\*a,c</sup>

<sup>a</sup> Institute of Physical Chemistry and Electrochemistry, Leibniz Universität Hannover, Callinstraße 3A, 30167 Hannover, Germany. E-mail: nadja.bigall@pci.uni-hannover.de

<sup>b</sup> Institute of Chemical Engineering, Universidad Nacional de San Juan, Av. Lib. San Martín Oeste 1109, San Juan J5400ARL, Argentina.

<sup>c</sup> Cluster of Excellency PhoenixD (Photonics, Optics, and Engineering – Innovation Across Disciplines), Hannover, Germany.

### Parameters obtained from XRD and Raman spectra

X-Ray diffraction patterns of the samples are obtained by means of Bruker AXS/D8 Advance diffractometer, between  $2\Theta = 10^\circ$  and  $85^\circ$  using  $K\alpha$ Cu radiation ( $\lambda = 0.15418$  nm, 40 kV, 30 mA) at a scan rate of  $2\Theta = 4^\circ \text{min}^{-1}$ . The crystallite size ( $L_c$  and  $L_a$ ) of the samples is calculated applying the Debye-Scherrer equation as follows,

$$L_a = \frac{1.84\lambda}{B_a \cos(\theta_a)}, \quad L_c = \frac{1.89\lambda}{B_c \cos(\theta_c)},$$

where  $\lambda$  is the wavelength of the radiation,  $B_a$  and  $B_c$  are the full width at half maximum (FWHM) calculated from the radian of (100 & 101) and (002) reflection respectively, and  $\Theta_a$  and  $\Theta_c$  are the corresponding scattering angles or reflection positions in radians. OriginPro 8.5 software is used for deconvolution and baseline-correction of the diffractograms. In addition, Gaussian fitting is performed to find the reflection parameters (FWHM, reflection positions  $2\Theta$ ).

**Table S1.** Crystallinity parameters extracted from XRD analysis of ACs from CH obtained by different activation routes

| ACs                               | (002) Reflection       |               |                           |           | (100/101) Reflection   |                     |                           |           |
|-----------------------------------|------------------------|---------------|---------------------------|-----------|------------------------|---------------------|---------------------------|-----------|
|                                   | $2\theta$ ( $^\circ$ ) | $d_{002}$ (Å) | FWHM ( $^\circ 2\theta$ ) | $L_c$ (Å) | $2\theta$ ( $^\circ$ ) | $d_{(100/101)}$ (Å) | FWHM ( $^\circ 2\theta$ ) | $L_a$ (Å) |
| CH-Steam                          | 23.89                  | 3.72          | 8.69                      | 9.25      | 43.48                  | 2.08                | 6.19                      | 28.23     |
| CH-KOH                            | 22.22                  | 3.99          | 10.74                     | 7.45      | 43.32                  | 2.08                | 6.27                      | 27.88     |
| CH-K <sub>2</sub> CO <sub>3</sub> | 29.64                  | 3.51          | 3.94                      | 20.65     | 43.03                  | 2.1                 | 4.64                      | 37.62     |

Raman spectroscopy is used to measure the degree of orientation of the graphitic structure in the ACs. The spectra are measured with a Bruker Senterra Raman microscope using a laser wavelength of 532 nm and a laser power of 5-10 mW. The ratio of intensities of the G and D bands ( $R=I_D/I_G$ ), their positions and widths (FWHM) are reported. In this way, quantitative criteria that allow to compare the degree of structural order in the carbon samples are presented.

**Table S2.** Raman parameters of ACs from CH obtained by different activation routes

| ACs                               | D- band                         |                          |        | G- band                         |                          |        | $I_D/I_G$ |
|-----------------------------------|---------------------------------|--------------------------|--------|---------------------------------|--------------------------|--------|-----------|
|                                   | Raman shift (cm <sup>-1</sup> ) | FWHM (cm <sup>-1</sup> ) | Height | Raman shift (cm <sup>-1</sup> ) | FWHM (cm <sup>-1</sup> ) | Height |           |
| CH-Steam                          | 1332                            | 163                      | 249    | 1588                            | 66                       | 238    | 1.04      |
| CH-KOH                            | 1349                            | 386                      | 171    | 1586                            | 95                       | 130    | 1.31      |
| CH-K <sub>2</sub> CO <sub>3</sub> | 1343                            | 252                      | 48     | 1581                            | 93                       | 50     | 0.96      |

### Parameters from EIS data

**Table S3.** Parameters from EIS data of AC cells from CH obtained by different activation routes

| Sample                            | R <sub>s</sub> (Ohm) | R <sub>ct</sub> (Ohm) | $\tau_0$ (s) | $f_k$ (Hz) |
|-----------------------------------|----------------------|-----------------------|--------------|------------|
| CH-Steam                          | 2.91                 | 20.0                  | 63           | 16         |
| CH-KOH                            | 2.58                 | 20.1                  | -            | 3          |
| CH-K <sub>2</sub> CO <sub>3</sub> | 2.59                 | 18.2                  | 79           | 20         |

### AC cells reported in literature

**Table S4.** Specific capacitance of AC cells reported in literature

| Biomass precursor | Activation method              | S <sub>BET</sub> (m <sup>2</sup> g <sup>-1</sup> ) | Cs (F g <sup>-1</sup> ) | Current Apply (A g <sup>-1</sup> ) | Reference          |
|-------------------|--------------------------------|----------------------------------------------------|-------------------------|------------------------------------|--------------------|
| Coffee husk       | KOH                            | 361                                                | 69                      | 0.01                               | <a href="#">13</a> |
|                   | CO <sub>2</sub>                | 709                                                | 176                     | 0.01                               |                    |
| Coconut Shell     | Steam                          | 1864                                               | 162                     | 1                                  | <a href="#">44</a> |
| Fallen leaves     | KOH                            | 1003                                               | 219                     | 0.5                                | <a href="#">16</a> |
|                   | K <sub>2</sub> CO <sub>3</sub> | 1078                                               | 222                     | 0.5                                |                    |
| Argan seed shell  | KOH                            | 2062                                               | 355                     | 0.25                               | <a href="#">14</a> |
| Coffee husk       | Steam                          | 1447                                               | 138                     | 0.5                                | This work          |
|                   | KOH                            | 2275                                               | 106                     | 0.5                                |                    |
|                   | K <sub>2</sub> CO <sub>3</sub> | 1156                                               | 129                     | 0.5                                |                    |

## FTIR spectra of CH and ACs from CH

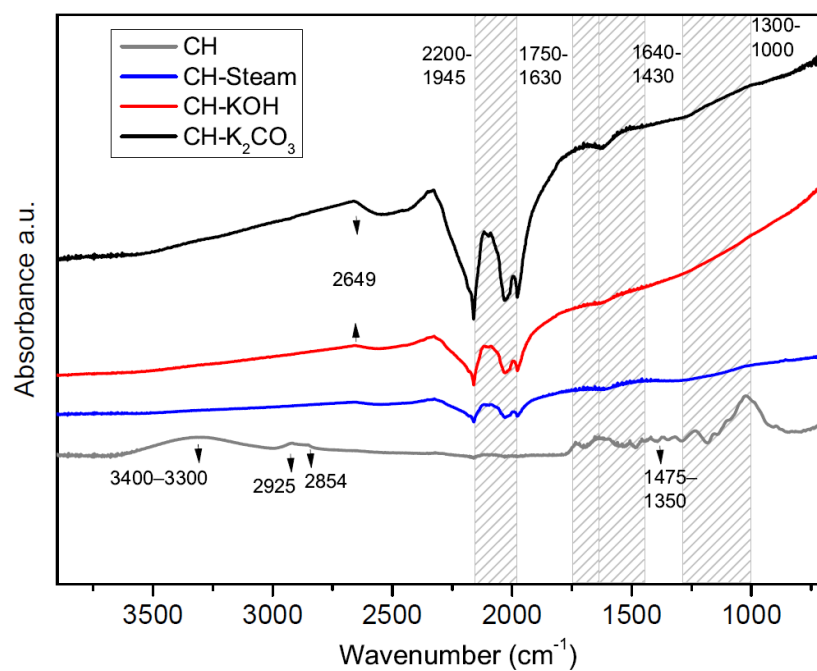

**Figure S1.** FTIR spectra of CH and ACs from CH (activation with steam, KOH, and  $\text{K}_2\text{CO}_3$  are in blue, red, and black, respectively).

## Specific capacitance ( $C_s$ ) of AC cells

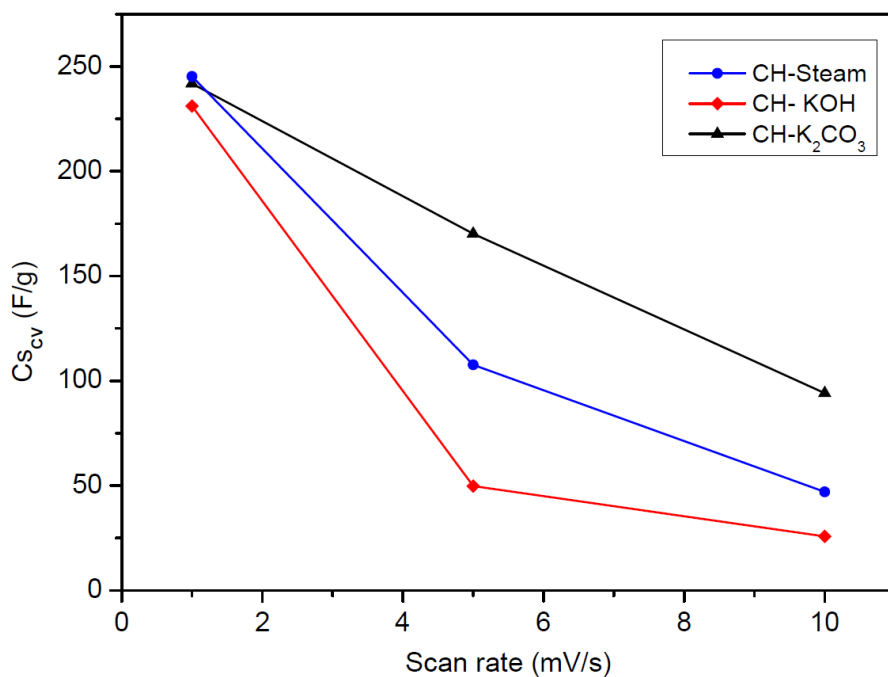

**Figure S2.** Specific capacitance from CV ( $C_{s_{CV}}$ ) of ACs from CH (activation with steam, KOH, and  $\text{K}_2\text{CO}_3$  are in blue, red, and black, respectively).
